# Supplementary material
Source: publisher site journal article supplement (https://www.spandidos-publications.com/1998/downloadSupplementary)

Figure S1. Overall survival analysis of (A) LIPE, (B) PNPLA2, (C) DGAT2 in ductal carcinoma *in situ* was performed using the Kaplan-Meier plotter. Lipase E hormone sensitive type (LIPE), patatin-like phospholipase domain-containing 2 (PNPLA2), diacylglycerol O-acyltransferase 2 (DGAT2).

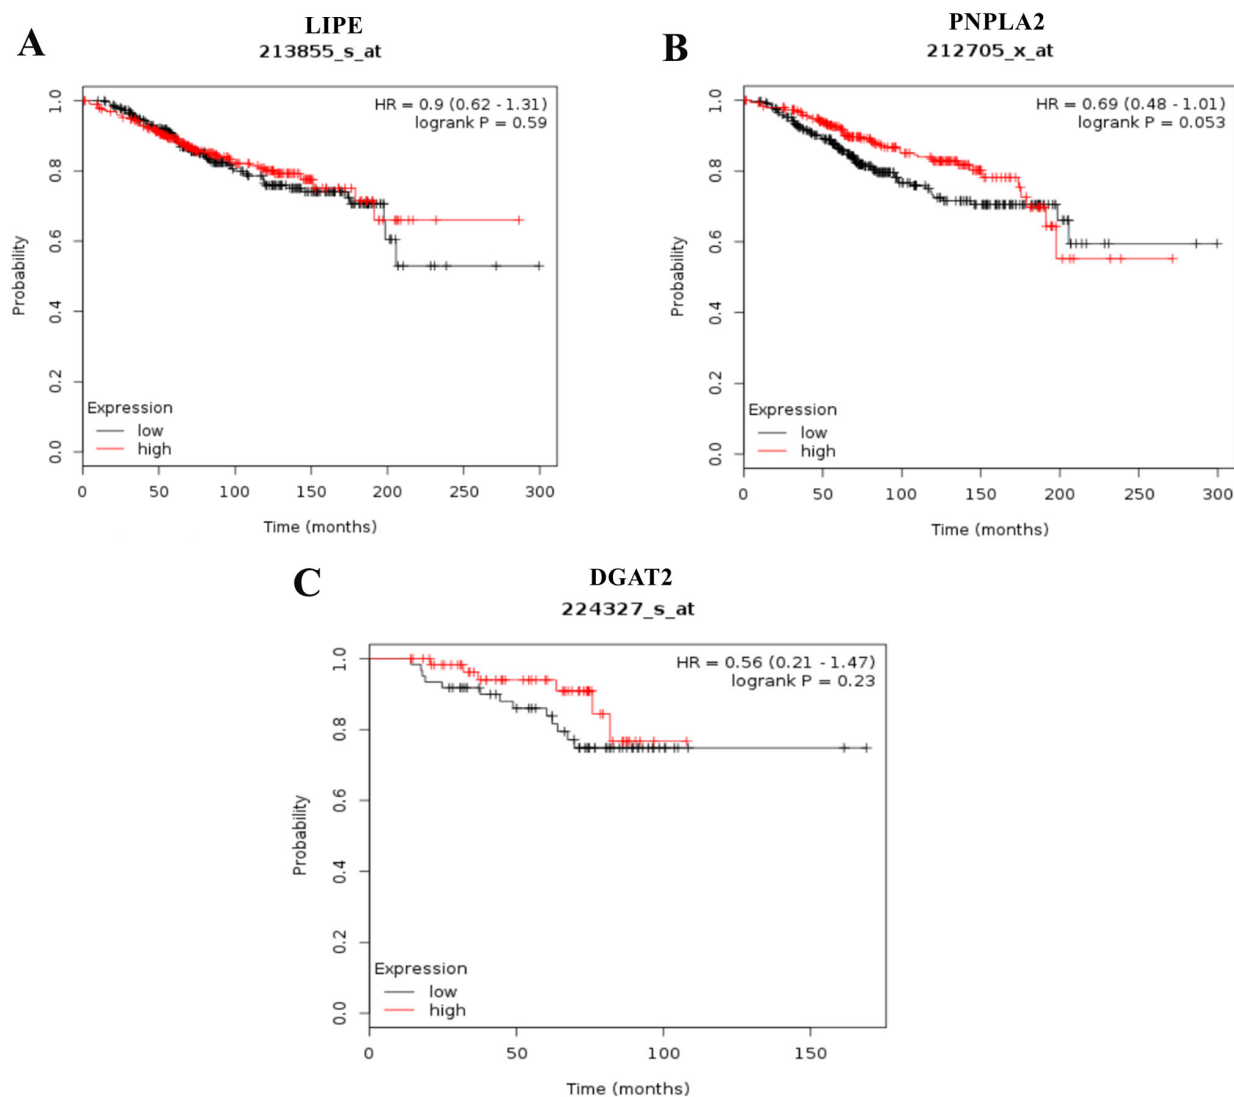

Supplement: Supplementary file 1 [file downloadSupplementary]
